# Supplementary material
Source: PubMed Central journal article supplement (PMC2753866)
Supplement: NIHMS143877-supplement-1_si_002.pdf [file NIHMS143877-supplement-1_si_002.pdf]

# A Rubisco mutant that confers growth under a normally “inhibitory” oxygen concentration<sup>†</sup>

Sriram Satagopan<sup>§,||</sup>, Stephanie S. Scott<sup>§</sup>, Todd G. Smith<sup>§,±</sup>, and F. Robert Tabita<sup>\*,§</sup>

Department of Microbiology and the Plant Molecular Biology/Biotechnology Program<sup>1</sup>, The

Ohio State University, 484 West 12<sup>th</sup> Avenue, Columbus, Ohio 43210-1292, USA

Fig. S1

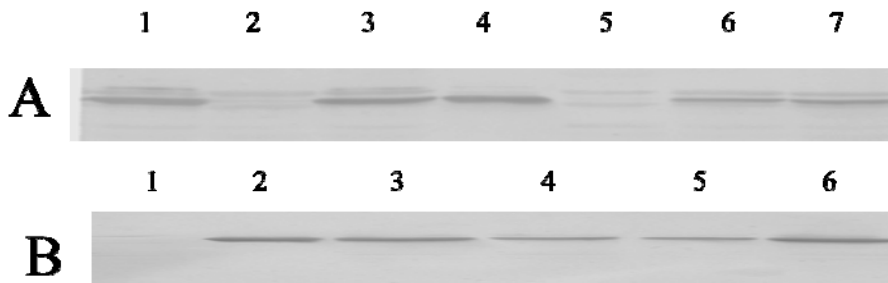

Western immunoblot analysis of crude extracts from (A) photoheterotrophic and (B) photoautotrophic grown *R. capsulatus* cultures of Rubisco-deficient strain SBI/II<sup>-</sup> complemented with wild-type or mutant *Synechococcus* enzymes. Western analyses were performed on crude extracts using form I antisera to the *Synechococcus* sp. strain PCC6301 enzyme from the cultures indicated. All lanes were loaded with approximately 5 µg protein except for the purified recombinant *Synechococcus* 6301 enzyme, loaded at at 1 µg. In (A) cultures were grown under photoheterotrophic conditions for four days under anaerobic conditions in malate minimal media in the light at 30°C at 5% CO<sub>2</sub>/95% H<sub>2</sub>. The following enzymes were used: lane 1, D103V/A375V in strain SBI/II<sup>-</sup>; lane 2, strain SBI/II<sup>-</sup> grown with DMSO as electron acceptor without any Rubisco; lane 3, D103V/A375V in strain SBI/II<sup>-</sup>; lane 4, purified *Synechococcus* 6301 Rubisco; lane 5, strain SBI/II<sup>-</sup> grown with DMSO as electron acceptor without any Rubisco; lane 6, D103V in strain SBI/II<sup>-</sup>; lane 7, A375V in strain SBI/II<sup>-</sup>. In (B) cultures were grown under photoautotrophic conditions for eight days in the light at 30°C at 5% CO<sub>2</sub>/95% H<sub>2</sub>. Lane 1, strain SBI/II<sup>-</sup> without any Rubisco grown initially in malate media containing DMSO; lane 2, purified *Synechococcus* 6301 Rubisco; lane 3, A375V in strain SBI/II<sup>-</sup>; lane 4, wild-type *Synechococcus* 6301 Rubisco in strain SBI/II<sup>-</sup>; lane 5, D103V in strain SBI/II<sup>-</sup>; lane 6, D103V/A375V in strain SBI/II<sup>-</sup>.
